# Supplementary material for: Genetic Diversity of Borreliaceae Species Detected in Natural Populations of Ixodes ricinus Ticks in Northern Poland
Source: MDPI journal article supplement (doi:10.3390/life13040972), 2023-04-09
Supplement: s1 [file s1]

Table S1. *flaB* gene mean genetic distance within individual *Borreliaceae* species detected in host seeking ticks from Northern Poland.

| Spirochete species        | Mean genetic distance within species |
|---------------------------|--------------------------------------|
| <i>Bl. garinii</i>        | 0.0076                               |
| <i>Bl. valaisiana</i>     | 0.0035                               |
| <i>Bl. afzelii</i>        | 0.0023                               |
| <i>Bl. spielmanii</i>     | 0.0034                               |
| <i>Bl. burgdorferi</i>    | 0.0051                               |
| <i>Bl. finlandensis</i>   | 0.0025                               |
| <i>Bl. americana</i>      | 0.0                                  |
| <i>Bl. californiensis</i> | 0.0064                               |
| <i>Bl. bissettiae</i>     | 0.0025                               |
| <i>Bl. carolinensis</i>   | 0.0006                               |
| <i>Bl. lanei</i>          | 0.0                                  |
| <i>Bl. lusitaniae</i>     | 0.0051                               |
| <i>B. turcica</i>         | 0.004                                |
| <i>B. miyamotoi</i>       | 0.0119                               |

Table S2. MEGA 11 results of mean distance between *Borreliaceae* species obtained on the basis of *flaB* gene sequence fragment comparison.

|                          | BG     | BV     | BA     | BS     | BB     | BF     | BAM    | BCL    | BBi    | BCR    | BLN    | BL     | BTC    |
|--------------------------|--------|--------|--------|--------|--------|--------|--------|--------|--------|--------|--------|--------|--------|
| <i>Bl.valaisiana</i>     | 0.0468 |        |        |        |        |        |        |        |        |        |        |        |        |
| <i>Bl.afzelii</i>        | 0.0539 | 0.0456 |        |        |        |        |        |        |        |        |        |        |        |
| <i>Bl.spielmanii</i>     | 0.0532 | 0.0538 | 0.0473 |        |        |        |        |        |        |        |        |        |        |
| <i>Bl.burgdorferi</i>    | 0.0653 | 0.0570 | 0.0627 | 0.0637 |        |        |        |        |        |        |        |        |        |
| <i>Bl.finlandensis</i>   | 0.0675 | 0.0606 | 0.0691 | 0.0711 | 0.0253 |        |        |        |        |        |        |        |        |
| <i>Bl.americana</i>      | 0.0567 | 0.0523 | 0.0621 | 0.0621 | 0.0290 | 0.0325 |        |        |        |        |        |        |        |
| <i>Bl.californiensis</i> | 0.0619 | 0.0524 | 0.0606 | 0.0622 | 0.0334 | 0.0417 | 0.0355 |        |        |        |        |        |        |
| <i>Bl.bissettiae</i>     | 0.0549 | 0.0495 | 0.0536 | 0.0574 | 0.0389 | 0.0430 | 0.0423 | 0.0317 |        |        |        |        |        |
| <i>Bl.carolinensis</i>   | 0.0560 | 0.0472 | 0.0520 | 0.0522 | 0.0382 | 0.0447 | 0.0400 | 0.0303 | 0.0080 |        |        |        |        |
| <i>Bl.lanei</i>          | 0.0518 | 0.0445 | 0.0511 | 0.0525 | 0.0277 | 0.0285 | 0.0245 | 0.0289 | 0.0310 | 0.0287 |        |        |        |
| <i>Bl.lusitaniae</i>     | 0.0590 | 0.0571 | 0.0654 | 0.0587 | 0.0589 | 0.0612 | 0.0581 | 0.0562 | 0.0554 | 0.0555 | 0.0459 |        |        |
| <i>B.turcica</i>         | 0.1650 | 0.1588 | 0.1684 | 0.1778 | 0.1702 | 0.1709 | 0.1653 | 0.1664 | 0.1643 | 0.1640 | 0.1634 | 0.1599 |        |
| <i>B.miyamotoi</i>       | 0.1930 | 0.1813 | 0.1836 | 0.1908 | 0.1970 | 0.1984 | 0.1875 | 0.1988 | 0.1972 | 0.1955 | 0.1863 | 0.1730 | 0.1460 |

BG – *Borreliella garinii*, BV – *Bl. valaisiana*, BA – *Bl. afzelii*, BS – *Bl. spielmanii*, BB – *Bl. burgdorferi*, BF – *Bl. finlandensis*, BAM – *Bl.*

*americana*, BCL – *Bl. californiensis*, BBi – *Bl. bissettiae*, BCR – *Bl. carolinensis*, BLN – *Bl. lanei*, BL – *Bl. lusitaniae*, BTC – *Borrelia turcica*.

Table S3. *mag-trnI* intergenic spaces mean genetic distance within individual *Borreliaceae* species detected in host seeking ticks from Northern Poland.

| Spirochete species       | Mean genetic dinstance within species |
|--------------------------|---------------------------------------|
| <i>Bl. garinii</i>       | 0.0377                                |
| <i>Bl.valaisiana</i>     | 0.0079                                |
| <i>Bl.afzelii</i>        | 0.011                                 |
| <i>Bl.spielmanii</i>     | 0.009                                 |
| <i>Bl.burgdorferi</i>    | 0.0123                                |
| <i>Bl.finlandensis</i>   | 0.0054                                |
| <i>Bl.americana</i>      | 0.0087                                |
| <i>Bl.californiensis</i> | 0.0013                                |
| <i>Bl.bissettiae</i>     | 0.0112                                |
| <i>Bl.carolinensis</i>   | 0.009                                 |
| <i>Bl.lanei</i>          | 0.008                                 |
| <i>Bl.lusitaniae</i>     | 0.0                                   |
| <i>B.turcica</i>         | 0.0022                                |
| <i>B.miyamotoi</i>       | 0.027                                 |

Table S4. MEGA 11 results of mean distance between *Borreliaceae* species obtained on the basis of intergenic spacer (IGS) of 3-methyladenine glycosylase (*mag*) and tRNA-Ile (*trnI*) genes sequence fragment comparison.

|                          | BG     | BV     | BA     | BS     | BB     | BF     | BAM    | BCL    | BBI    | BCR    | BLN    | BL     | BTC    |
|--------------------------|--------|--------|--------|--------|--------|--------|--------|--------|--------|--------|--------|--------|--------|
| <i>Bl.valaisiana</i>     | 0.2002 |        |        |        |        |        |        |        |        |        |        |        |        |
| <i>Bl.afzelii</i>        | 0.2003 | 0.2185 |        |        |        |        |        |        |        |        |        |        |        |
| <i>Bl.spielmanii</i>     | 0.1938 | 0.2080 | 0.1555 |        |        |        |        |        |        |        |        |        |        |
| <i>Bl.burgdorferi</i>    | 0.1554 | 0.1662 | 0.2168 | 0.2168 |        |        |        |        |        |        |        |        |        |
| <i>Bl.finlandensis</i>   | 0.1496 | 0.1571 | 0.2040 | 0.2055 | 0.0320 |        |        |        |        |        |        |        |        |
| <i>Bl.americana</i>      | 0.1376 | 0.1724 | 0.2320 | 0.2245 | 0.0650 | 0.0569 |        |        |        |        |        |        |        |
| <i>Bl.californiensis</i> | 0.1320 | 0.1524 | 0.1664 | 0.1663 | 0.1256 | 0.1102 | 0.1282 |        |        |        |        |        |        |
| <i>Bl.bissettiae</i>     | 0.1812 | 0.2103 | 0.2433 | 0.2218 | 0.1267 | 0.1209 | 0.1379 | 0.1226 |        |        |        |        |        |
| <i>Bl.carolinensis</i>   | 0.1557 | 0.1971 | 0.2287 | 0.1907 | 0.1014 | 0.0937 | 0.1172 | 0.1088 | 0.0836 |        |        |        |        |
| <i>Bl.lanei</i>          | 0.1448 | 0.1382 | 0.2096 | 0.1873 | 0.0635 | 0.0582 | 0.0583 | 0.0911 | 0.1175 | 0.1038 |        |        |        |
| <i>Bl.lusitaniae</i>     | 0.2164 | 0.1374 | 0.2216 | 0.2033 | 0.1218 | 0.1270 | 0.1318 | 0.1461 | 0.1667 | 0.1471 | 0.1244 |        |        |
| <i>B.turcica</i>         | 0.3784 | 0.4089 | 0.4075 | 0.4429 | 0.3806 | 0.3954 | 0.3754 | 0.4062 | 0.3768 | 0.4026 | 0.3804 | 0.4181 |        |
| <i>B.miyamotoi</i>       | 0.4259 | 0.4176 | 0.4540 | 0.4287 | 0.4098 | 0.3956 | 0.4007 | 0.4390 | 0.4357 | 0.4304 | 0.3940 | 0.4014 | 0.2674 |

BG – *Borreliella garinii*, BV – *Bl. valaisiana*, BA – *Bl. afzelii*, BS – *Bl. spielmanii*, BB – *Bl. burgdorferi*, BF – *Bl. finlandensis*, BAM – *Bl.*

*americana*, BCL – *Bl. californiensis*, BBI – *Bl. bissettiae*, BCR – *Bl. carolinensis*, BLN – *Bl. lanei*, BL – *Bl. lusitaniae*, BTC – *Borrelia turcica*.
